# Supplementary material
Source: publisher figshare collection journal article supplement (https://acs.figshare.com/ndownloader/files/3995890)
Supplement: Supplementary file 1 [file 3995890]

# Sonohydrothermal Synthesis of Nanotstructured (Ce,Zr)O<sub>2</sub> Mixed Oxides with Enhanced Catalytic Performance

Camille Cau,<sup>†,‡</sup> Yannick Guari,<sup>‡</sup> Tony Chave,<sup>†</sup> Joulia Larionova,<sup>‡</sup> Patrick Pochon,<sup>§</sup> and Sergey I. Nikitenko<sup>†</sup>

<sup>†</sup>Institut de Chimie Séparative de Marcoule (ICSM), UMR 5257 – CEA – CNRS – UMII - ENSCM, Centre de Marcoule, BP 17171, 30207 Bagnols sur Cèze, Cedex, France

<sup>‡</sup>Institut Charles Gerhardt (ICG), UMR 5253 – UMII –CNRS, Chimie Moléculaire et Organisation du Solide, Université de Montpellier II, Bât 17 – CC 1701, 34095 Montpellier Cedex 5, France

<sup>§</sup>CEA/DEN/MAR/DRCP/SMCS, CEA Centre de Marcoule, BP 17171, 30207 Bagnols sur Cèze, Cedex, France

## Supporting Information

### *Hydrothermal treatment.*

Stainless steel made hydrothermal reactor (Fig. S11) with a volume of 50 mL is equipped with PTFE inner vessel and pressure safety valve.

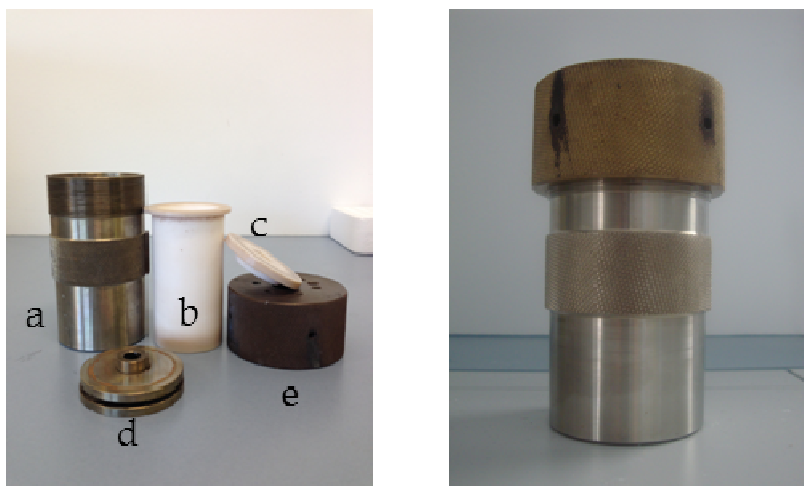

Fig. S11. Homemade 50 mL hydrothermal reactor (left dismantled, right assembled), a and e: stainless recipient and his cover, b and c : Teflon skirt and his cover, d : pressure safety valve

*Ultrasonically assisted coprecipitation.*

Ultrasonic treatments were carried out within a glass reactor equipped with a 1 cm<sup>2</sup> titanium probe and piezoelectric transducer supplied by a 20 kHz generator (750 W, Sonics & Materials) shown in Fig. SI2. In all experiments the solution volume was 50 mL insuring that the probe was reproducibly immersed below the surface of the sonicated liquid. The irradiation intensity,  $I = 32 \text{ W} \cdot \text{cm}^{-2}$ , or the absorbed acoustic power,  $P_{ac} = 0.46 \text{ W} \cdot \text{mL}^{-1}$ , was assessed by thermal probe method. Temperature at 80°C during the process was provided by ultrasonic heating of irradiated liquid.

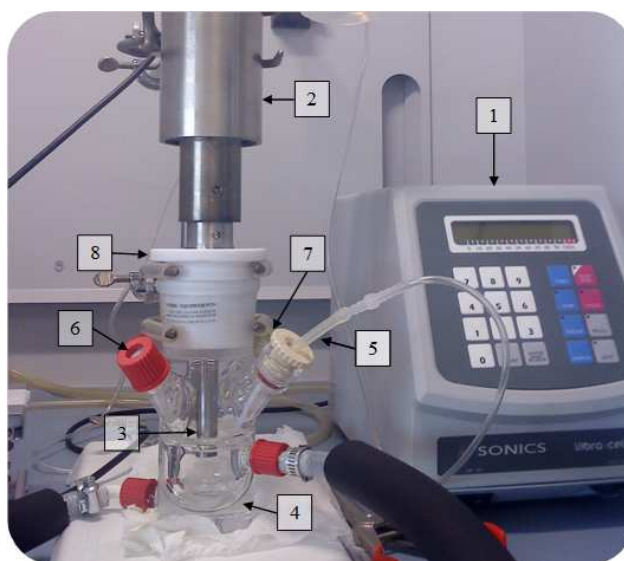

Figure SI2. Experimental set-up for ultrasonic treatment at 20 kHz. 1. Ultrasonic generator of 20 kHz ultrasound with 750 W of maximal electric power, 2. Piezoceramic transducer, 3. Titanium horn, 4. Thermostated reactor, 5. Gas inlet, 6. Sample outlet, 7. Thermocouple, 8. PTFE ring.

### *Sonohydrothermal treatment.*

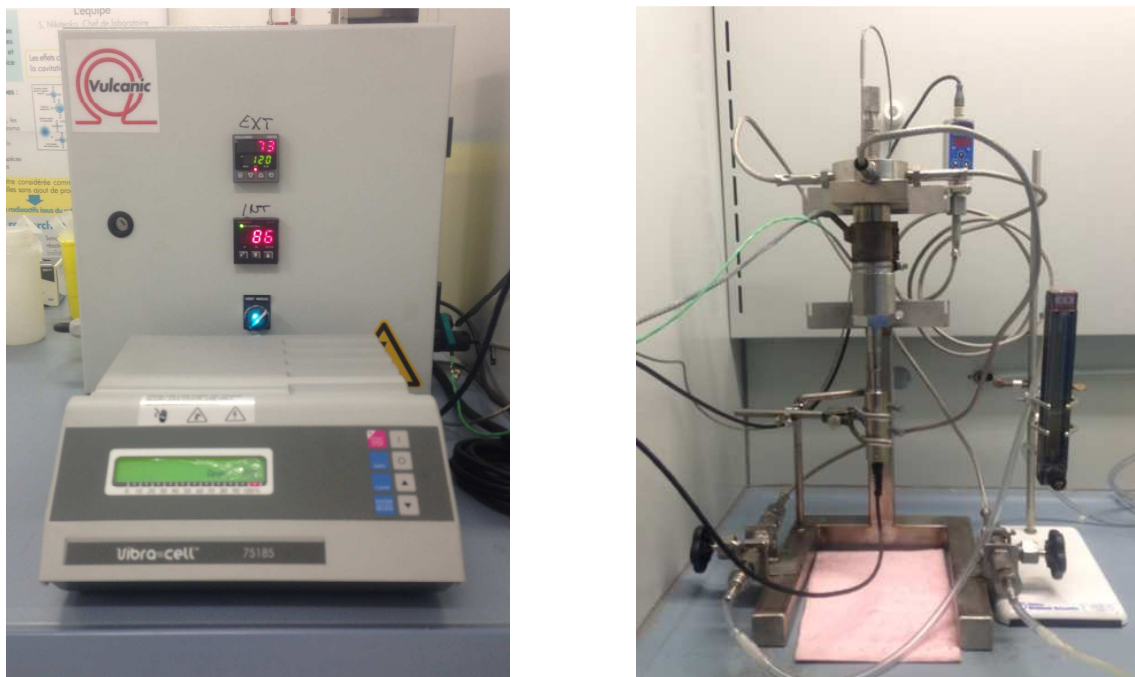

Figure SI3. Photograph of the ultrasonic generator and the control panel.

### *Analytical procedures*

Hydrogen peroxide concentration was monitored by spectrophotometry with Ti(IV) in 0.5 M  $\text{HNO}_3$  containing 0.01 M of hydrazine nitrate to remove  $\text{HNO}_2$  admixtures from nitric acid ( $\lambda = 410 \text{ nm}$ ,  $\varepsilon = 658 \text{ cm}^{-1} \text{ M}^{-1}$ ).

Gaseous products in the outlet gas were analyzed using a Thermo Scientific VG ProLab Benchtop quadrupole mass spectrometer. The concentration of  $\text{H}_2$  was followed with the multiple ion monitoring (MIM) provided by the software. The  $\text{H}_2$  formation rate was quantified using external calibration curves prepared with standard gas mixtures (Messer) with a resulting statistical error measured by  $\sim 20\%$ . The water vapor in the outlet gas was trapped using molecular sieves (Sigma-Aldrich, 3 Å) prior to mass spectrometric analysis.

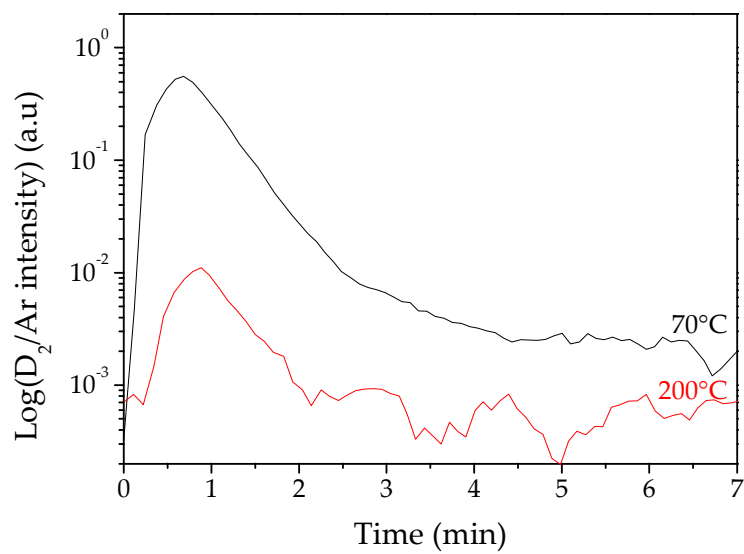

Figure SI4. Mass spectrometric measurements of  $D_2$  released after 3 h of sonohydrothermal treatment at 40% of ultrasonic amplitude.

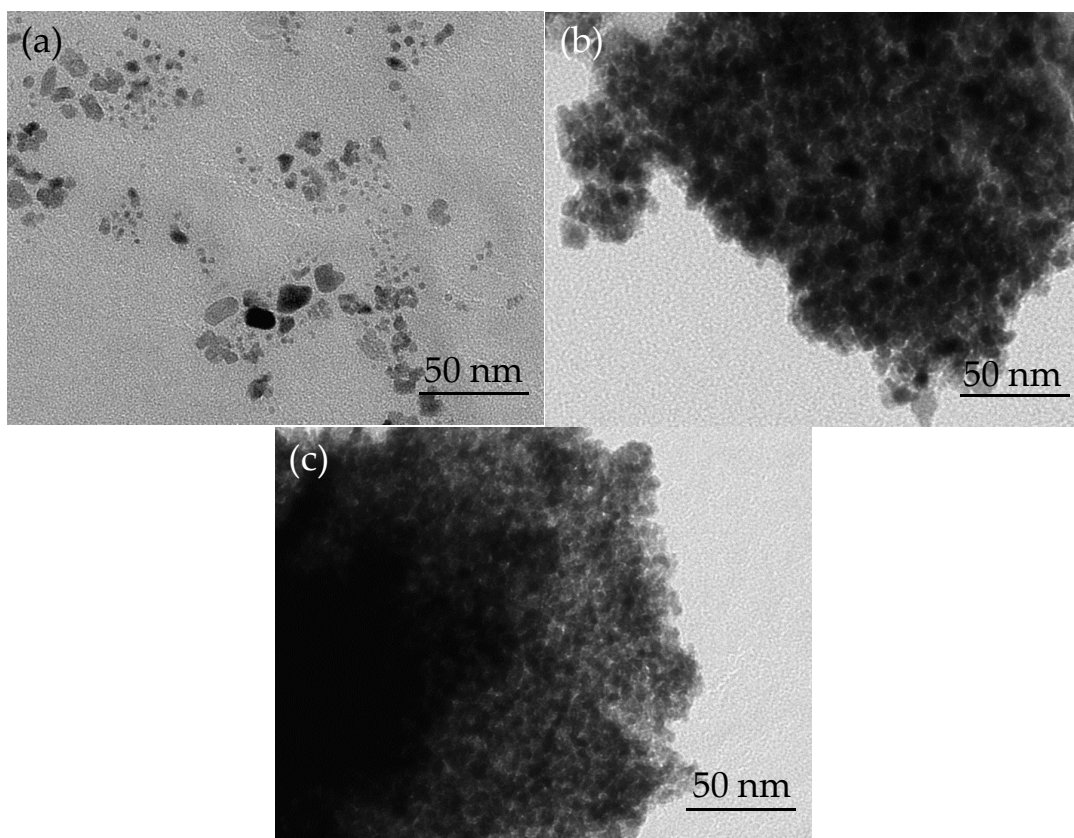

Figure SI5. TEM pictures of heated samples  $M_{CeZr}$  (a),  $S_{CeZr}$  (b) and  $H_{CeZr}$  (c).

## Complementary data

Without heat treatment, the support synthesis by the sonohydrothermal method allows to obtain a catalyst which exhibit a catalytic activity closed to the one prepared with the heated sample. Nevertheless, the benefit in catalytic activity with the adjustment of HCOOH concentration is weaker than the one with **Pt/ST<sub>CeZr</sub>**. Moreover, this material is probably less resistant than a catalyst prepared with a heated support.

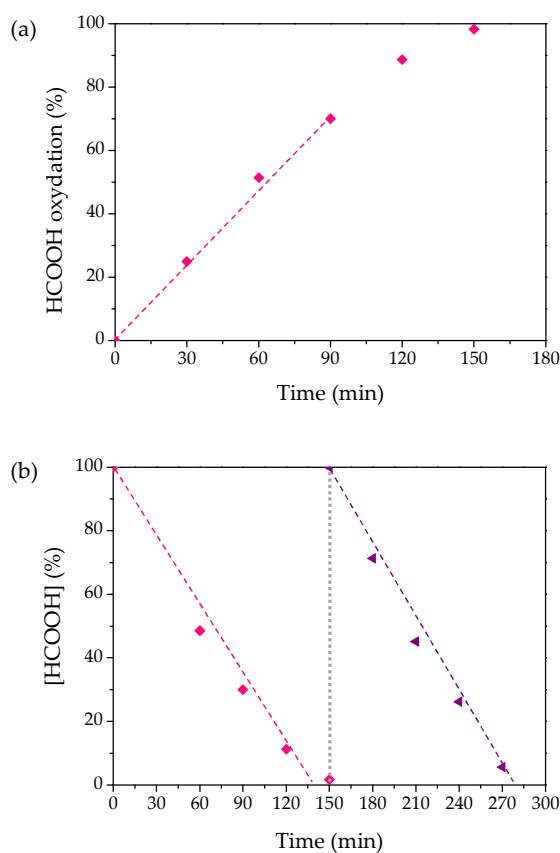

Fig SI6. : (a) Formic acid catalytic oxidation with 0.5 g.L<sup>-1</sup> of catalyst **Pt/ST<sub>CeZr</sub>**<sup>\*</sup> with 1.5 %wt. of Pt ([HCOOH]<sub>0</sub> = 0.1 M), (b) Formic acid concentration with 0.5 g.L<sup>-1</sup> of catalyst **Pt/ST<sub>CeZr</sub>**<sup>\*</sup> with 1.5 %wt. of Pt ([HCOOH]<sub>0</sub> = 0.1 M) ◆, adjustment ▲ of HCOOH concentration, --- [HCOOH] adjustment.

Table SI1. Molar contents of cerium and zirconium measured by EDX method, measured specific surface area ( $S_{\text{BET}}$  -  $\text{m}^2.\text{g}^{-1}$ ), internal and external surface ( $S_{\text{int}}$  and  $S_{\text{ext}}$  -  $\text{m}^2.\text{g}^{-1}$ ) of as prepared  $\text{Pt}/\text{ST}_{\text{CeZr}}^*$  and HCOOH oxidation rate ( $\mu\text{mol}.\text{min}^{-1}$ ) in the presence of  $\text{Pt}/\text{ST}_{\text{CeZr}}^*$  (1.5%.wt).

| Material                              | $x_{\text{Ce}}$ | $x_{\text{Zr}}$ | $S_{\text{BET}}$ | $S_{\text{int}}$ | $S_{\text{ext}}$ | Initial HCOOH oxidation rate |       |
|---------------------------------------|-----------------|-----------------|------------------|------------------|------------------|------------------------------|-------|
|                                       |                 |                 |                  |                  |                  | Adjustment                   |       |
|                                       |                 |                 |                  |                  |                  | 0                            | 1     |
| $\text{Pt}/\text{ST}_{\text{CeZr}}^*$ | 0.54            | 0.46            | 139              | 133              | 6                | 33.07                        | 34.56 |
